# Supplementary material for: IL-31 uncouples skin inflammation from itch sensation in allergic dermatitis
Source: bioRxiv or medRxiv preprint supplement (doi:10.1101/2021.05.12.443916), 2021-05-13
Supplement: Supplementary file [file media-1.pdf]

## Supplementary Material:

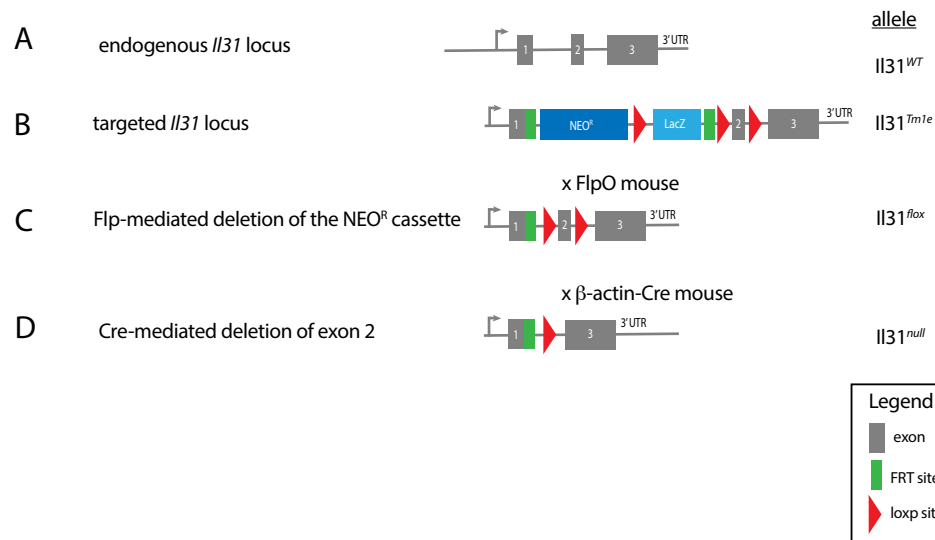

**Fig. S1. Transgene schematic and serial crosses to generate *Il31*<sup>null</sup> allele**

**(A)** Endogenous 3-exon *Il31* allele

**(B)** The *Il31*<sup>Tm1e</sup> transgene interrupts exon 1 of the endogenous *Il31* locus with a neomycin resistance/LacZ cassette.

**(C)** Mice containing an *Il31*<sup>lox</sup> allele were generated by crossing an *Il31*<sup>Tm1e</sup> transgenic mouse with a Flp-recombinase expressing strain (FlpO), resulting in germline excision of the region between FRT sites (green rectangles).

**(D)** Mice containing an *Il31*<sup>null</sup> allele were generated by crossing an *Il31*<sup>lox</sup> transgenic mouse with a ubiquitous Cre recombinase-expressing strain ( $\beta$ -actin Cre), resulting in germline excision of the region between loxp sites (red triangles).

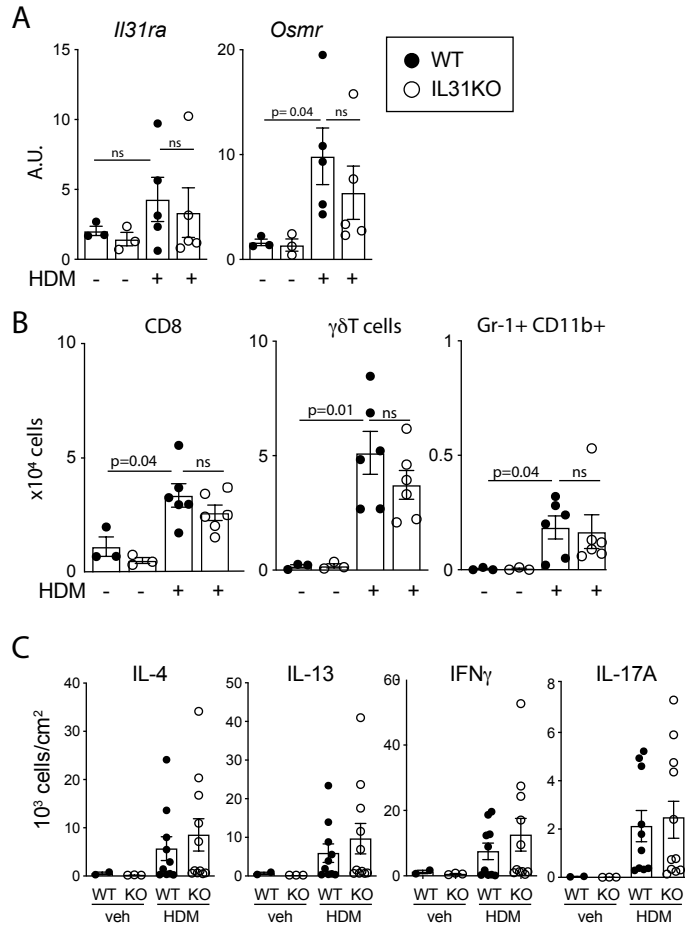

**Fig. S2. Supplementary data to accompany Figure 2**

**(A)** Taqman-based qPCR detection of *Il31ra* and *Osmr* in control and HDM-treated skin.

**(B)** CD45<sup>+</sup> (hematopoietic) populations increased in HDM-treated skin include CD8 T cells, dermal  $\gamma\delta$  T cells, and CD11b<sup>+</sup>Gr1<sup>+</sup> cells (combined monocytes and neutrophils).

**(C)** Flow cytometry data from Figure 2F enumerated as cytokine-producing CD4 T cells per mouse. Both vehicle (control) and HDM-treated samples are included for comparison.

WT, black circles; IL31KO, open circles. Data reflect n=3 animals per control group and n $\geq$ 5 per HDM treatment group, and are representative of 3 independent experiments (A, B), or pooled from 2 independent experiments with n $\geq$ 5 mice per treatment group (C). Bars indicate mean  $\pm$  SD. Statistical significance determined by unpaired student's t-test.

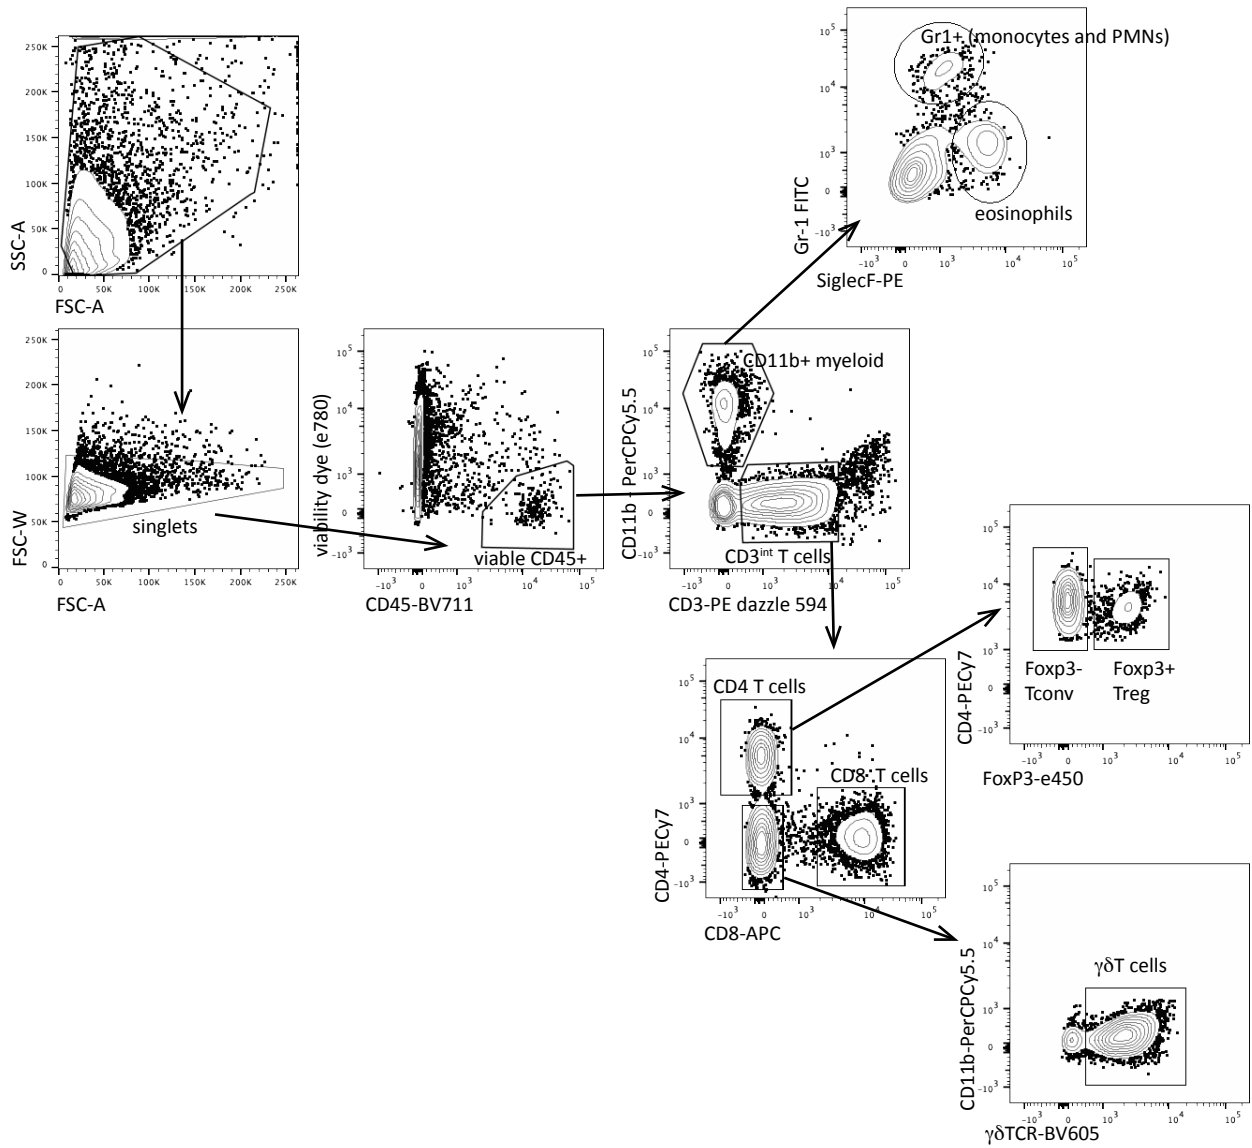

**Fig. S3. Gating strategy for cutaneous CD45+ (hematopoietic) subsets**

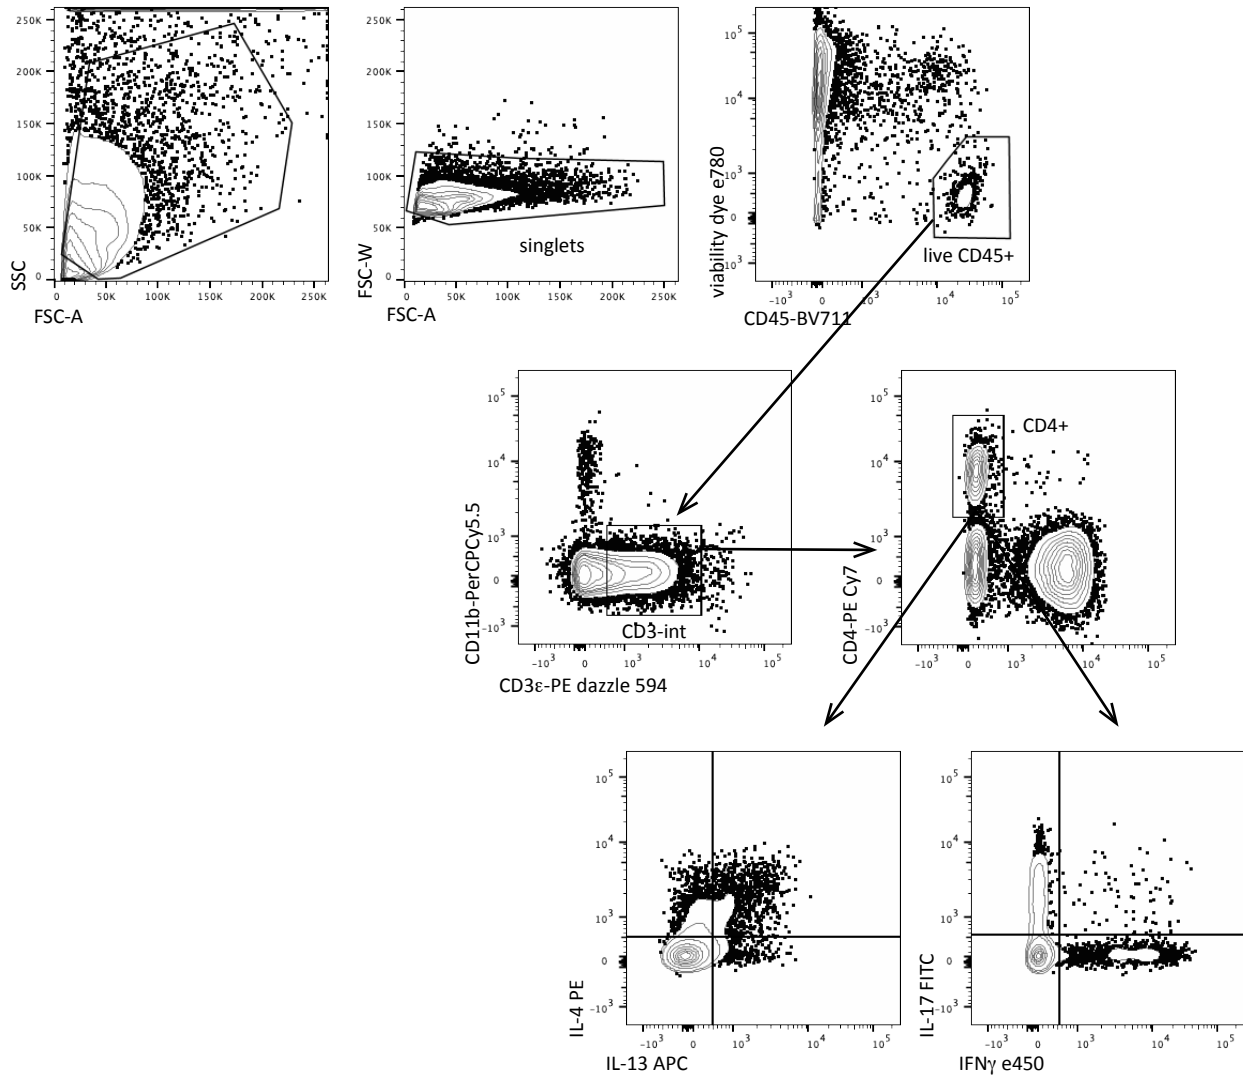

**Fig. S4. Gating strategy for CD4 T cell intracellular cytokine detection**

A Cluster Marker Genes (defined by LFC)

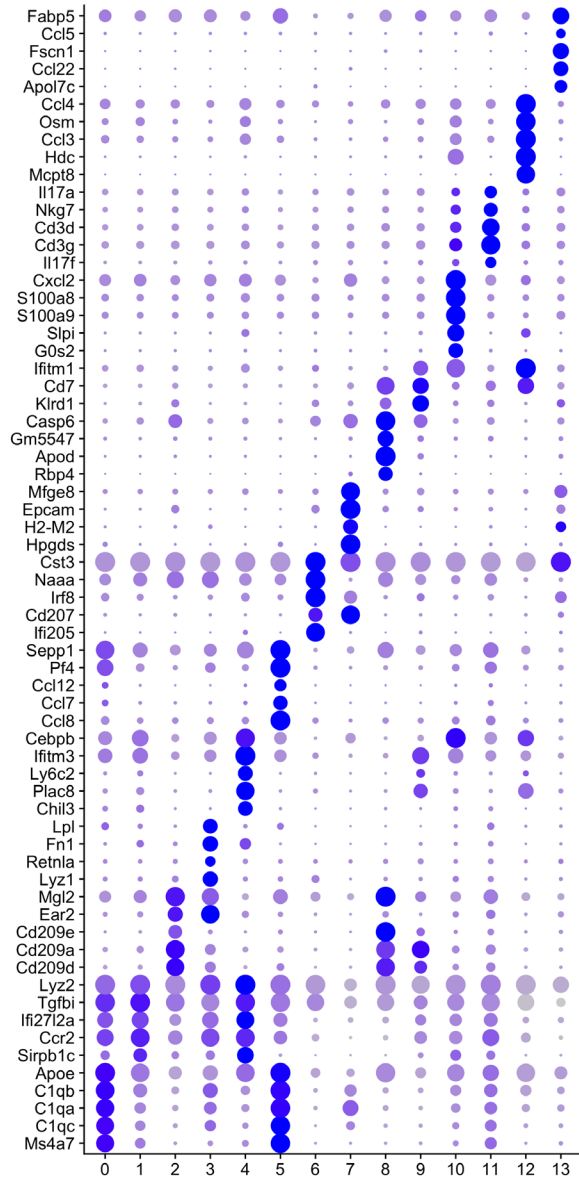

B Cluster Marker Genes (defined by LFC x PCT)

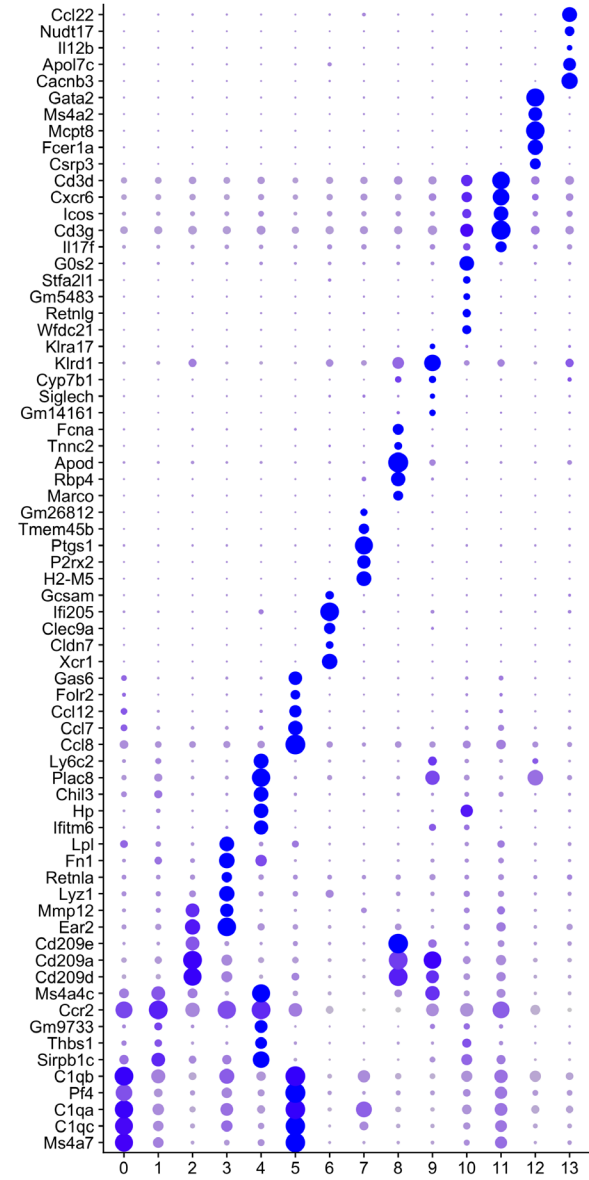

C

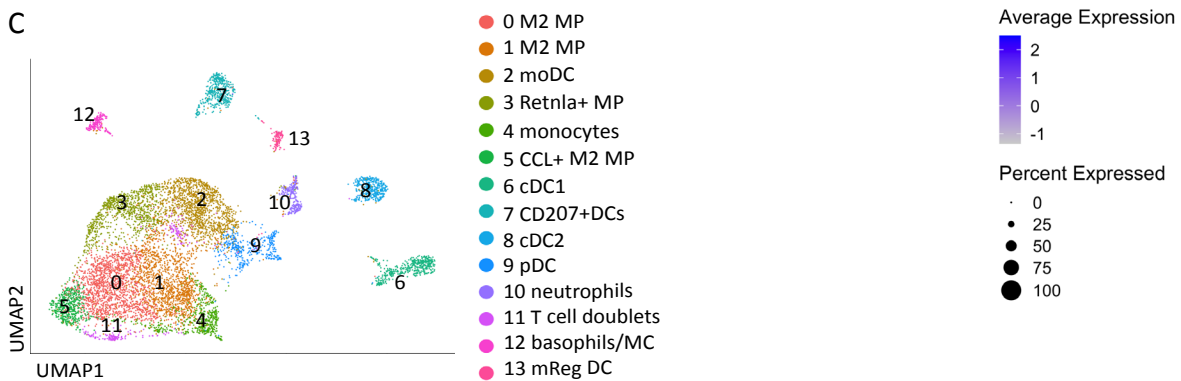

**Fig. S5. Cell Marker genes for the 13 myeloid clusters**

**(A)** Dot plot of top 5 differentially-expressed genes defined by average log fold change (LFC)

**(B)** Dot plot of top 5 differentially-expressed genes defined as the product of the average log fold change (LFC) and the cluster specificity (PCT ratio).

**(C)** UMAP plot and cluster identities from Figure 4 reproduced for reference

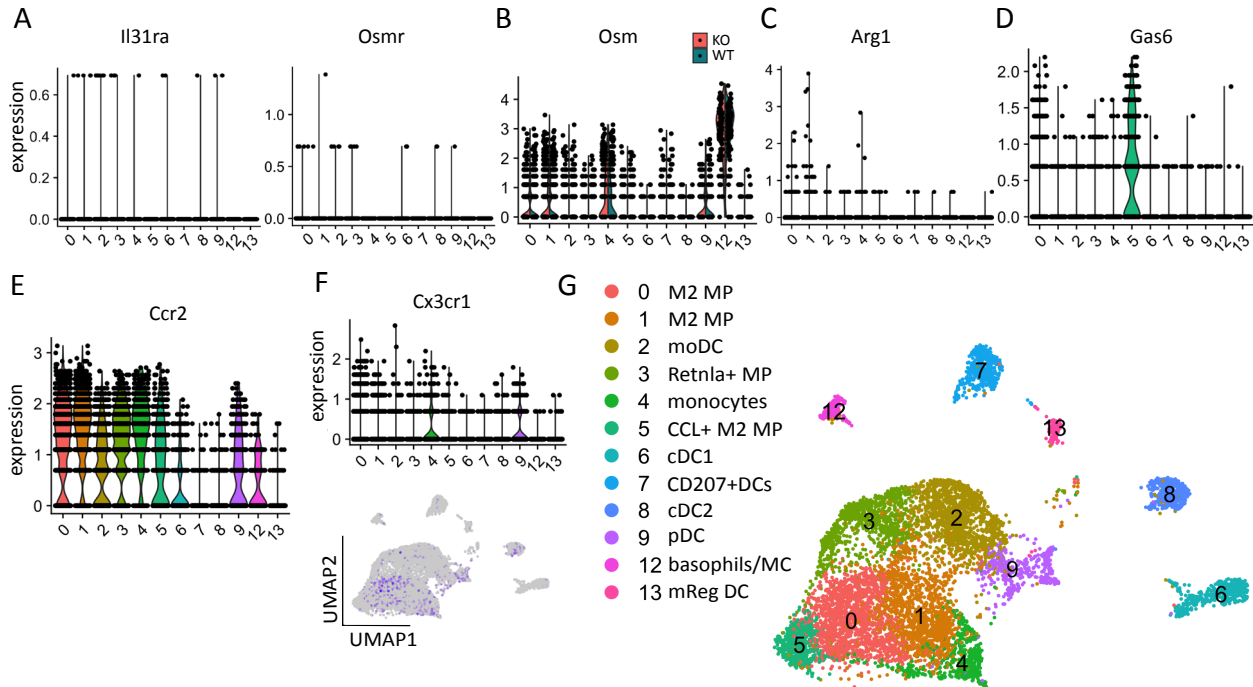

**Fig. S6. Supplementary data to accompany Figures 4-5.**

**(A)** *Il31ra* and *Osmr* only detected in scattered cells

**(B)** Split violin plot demonstrates similar *Osm* expression in WT and IL31RAKO across clusters (turquoise = WT, salmon = IL31RAKO).

**(C)** Rare cells express M2 marker *Arg1*

**(D)** Expression of Mertk ligand and cluster 5 marker *Gas6*.

**(E)** *Ccr2* is broadly expressed by macrophages (clusters 0,1,3,4,5) and monocyte-derived DCs (cluster 2).

**(F)** Distribution of *Cx3cr1* across myeloid clusters (top: violin plot; bottom, feature plot)

**(G)** UMAP plot and cluster identities from Figure 5 reproduced for reference
